# Supplementary material for: A Vacuum Ultraviolet Ion Source (VUV-IS) for Iodide-Chemical Ionization Mass Spectrometry: A Substitute for Radioactive Ion Sources
Source: Copernicus journal article supplement (doi:10.5194/amt-2020-13), 2020-02-03
Supplement: Supplementary file 1 [file amt-2020-13-supplement.pdf]

*Supplement of*

# **A Vacuum Ultraviolet Ion Source (VUV-IS) for Iodide-Chemical Ionization Mass Spectrometry: A Substitute for Radioactive Ion Sources**

5 **Yi Ji et al.**

*Correspondence to:* L. Gregory Huey (greg.huey@eas.gatech.edu)

10

15

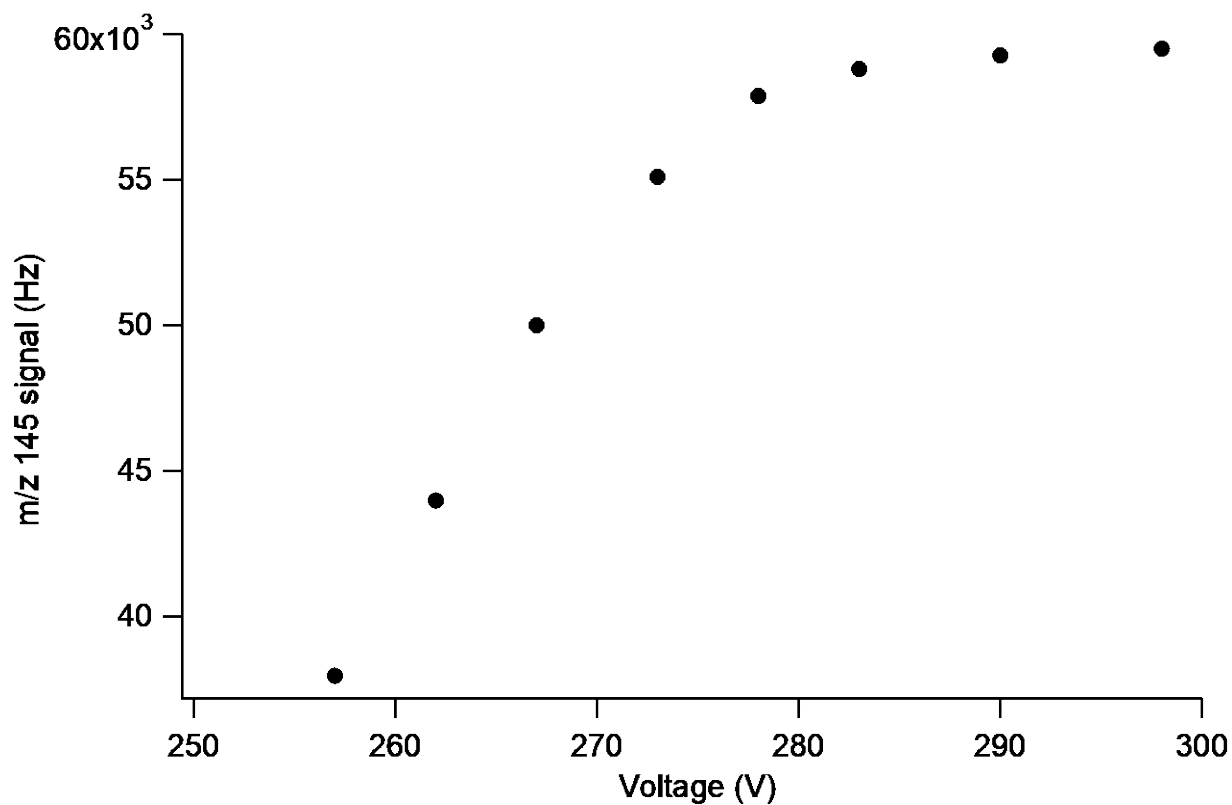

**Figure S1.** CIMS ion current at m/z 145 ( $\text{I}(\text{H}_2\text{O})$ ) as a function of voltage across the krypton lamp. Note that the lamp ignites at voltage of ~280 V.

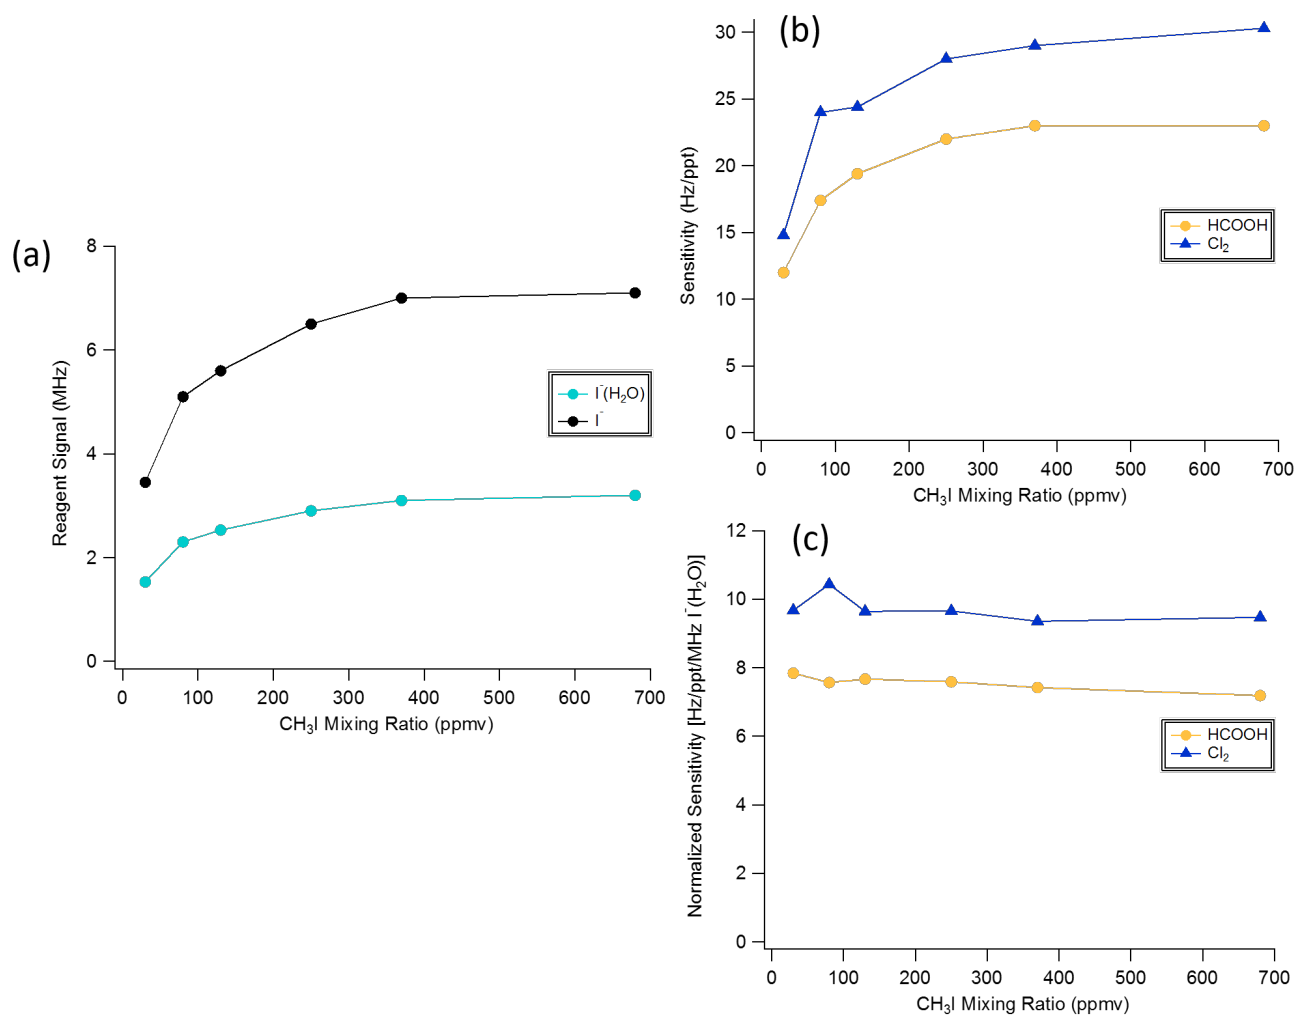

**Figure S2.** TOF-CIMS (a) reagent signal levels (b) sensitivity (c) normalized sensitivity as a function of  $\text{CH}_3\text{I}$  at 30 torr.

## 25 Sample Calculation of Absorption of VUV light by CH<sub>3</sub>I

To calculate how much of the VUV light is absorbed, the Beer-Lambert Law is applied,

$$\frac{I(\lambda)}{I_0(\lambda)} = \exp(-\sigma(\lambda)nL)$$

where  $I(\lambda)$  is the intensity of light at wavelength  $\lambda$  after absorption,  $I_0(\lambda)$  is the original light intensity at  
30 wavelength  $\lambda$ ,  $\sigma(\lambda)$  is the absorption cross section of the absorber molecule at wavelength  $\lambda$ ,  $n$  is  
number concentration of the absorber molecule, and  $L$  is the path length over which the light can be  
absorbed.

Sample calculation:

For 86.5 ppmv of CH<sub>3</sub>I at a pressure of 20 torr

35  $n = 5.70 \times 10^{13} \text{ molecule cm}^{-3}$

$$\sigma(\lambda) = 7 \times 10^{17} \text{ cm}^2 \text{ molecule}^{-1}$$

$$L = 21 \text{ cm}$$

$$\frac{I(\lambda)}{I_0(\lambda)} = \exp(-\sigma(\lambda)nL) = 0.92$$

Therefore, in this example ~8% of the light emitted from the VUV lamp is absorbed by the methyl  
40 iodide.
